# Supplementary material for: Multi-omics analyses reveal metabolic alterations regulated by hepatitis B virus core protein in hepatocellular carcinoma cells
Source: PubMed Central journal article supplement (PMC5253728; doi:10.1038/srep41089), 2017-01-23
Supplement: srep41089-s1.pdf [file srep41089-s1.pdf]

# **Multi-omics analyses reveal metabolic alterations regulated by hepatitis B virus core protein in hepatocellular carcinoma cells**

Qi Xie<sup>1,2†</sup>, Fengxu Fan<sup>2,3†</sup>, Wei Wei<sup>2†</sup>, Yang Liu<sup>4†</sup>, Zhongwei Xu<sup>2</sup>, Linhui Zhai<sup>2</sup>, Yingzi Qi<sup>2</sup>, Bingyu Ye<sup>5</sup>, Yao Zhang<sup>2</sup>, Sumit Basu<sup>6</sup>, Zhihu Zhao<sup>5</sup>, Junzhu Wu<sup>1\*</sup>, Ping Xu<sup>1,2,3\*</sup>

<sup>1</sup>School of Basic Medical Sciences, Key Laboratory of Combinatorial Biosynthesis and Drug Discovery of Ministry of Education, School of Pharmaceutical Sciences, Wuhan University, Wuhan 430071, China;

<sup>2</sup>State Key Laboratory of Proteomics, Beijing Proteome Research Centre, National Engineering Research Centre for Protein Drugs, National Centre for Protein Sciences Beijing, Institute of Radiation Medicine, Beijing 102206, China;

<sup>3</sup>Anhui Medical University, Hefei 230032, China;

<sup>4</sup>Department of Chemical & Biomolecular Engineering, National University of Singapore, Singapore 117585;

<sup>5</sup>Beijing Institute of Bioengineering, Beijing 100071, China;

<sup>6</sup>Center for Pharmacometrics and Systems Pharmacology, College of Pharmacy, University of Florida, 6550 Sanger Road, Orlando, FL 32827, USA.

† These authors contributed equally to this work.

\*Corresponding authors,

Ping Xu, Beijing Proteome Research Center, 38 Science Park Road, Changping District, Beijing 102206, China

Tel: +8610-61777113, Fax: +8610-61777050, Email: xuping@mail.ncpsb.org

Junzhu Wu,185 Donghu Road, Wuchang District, Wuhan 430071, China

Tel: +8627-68759311, Fax: +8627-68759222, Email: [wujunzhu@whu.edu.cn](mailto:wujunzhu@whu.edu.cn)

## Supplementary Figure Legends

**Figure S1.** Molecular Function enrichment revealed the network down-regulated by HBc. The results only showed pathways with  $P < 0.05$  and cluster protein number  $\geq 3$ .

**Figure S2.** Sequence alignment results of the HBc recombinant plasmid.

Figure S1

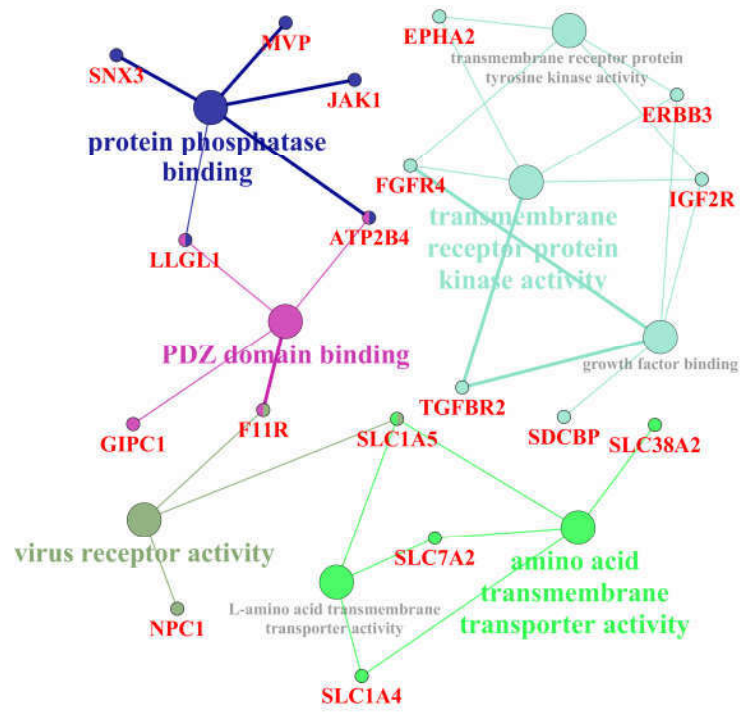

## Figure S2

|                       |                                            |     |
|-----------------------|--------------------------------------------|-----|
| HBC-3FLAG.CMV-F (H03) | ATGCAACTTTTTACCTCTGCCTAATCATCTCTTGTTTCAT   | 79  |
| HBC_ORF               | ATGCAACTTTTTACCTCTGCCTAATCATCTCTTGTTTCAT   | 40  |
| Consensus             | atgcaactttttcacctctgcctaatacatctcttgttcat  |     |
| HBC-3FLAG.CMV-F (H03) | GTCCTACTGTTCAAGCCTCCAAGCTGTGCCTTGGGTGGCT   | 119 |
| HBC_ORF               | GTCCTACTGTTCAAGCCTCCAAGCTGTGCCTTGGGTGGCT   | 80  |
| Consensus             | gtcctactgttcaagcctccaagctgtgccttgggtggct   |     |
| HBC-3FLAG.CMV-F (H03) | TTGGGGCATGGACATCGACCCTTATAAAGAATTTGGAGCT   | 159 |
| HBC_ORF               | TTGGGGCATGGACATCGACCCTTATAAAGAATTTGGAGCT   | 120 |
| Consensus             | ttggggcatggacatcgacccttataaagaatttggagct   |     |
| HBC-3FLAG.CMV-F (H03) | ACTGTGGAGTTACTCTCGTTTTTGCCTTCTGACTTCTTTC   | 199 |
| HBC_ORF               | ACTGTGGAGTTACTCTCGTTTTTGCCTTCTGACTTCTTTC   | 160 |
| Consensus             | actgtggagttactctcgTTTTTgccttctgacttctttc   |     |
| HBC-3FLAG.CMV-F (H03) | CTTCAGTACGAGATCTTCTAGATACCGCCTCAGCTCTGTA   | 239 |
| HBC_ORF               | CTTCAGTACGAGATCTTCTAGATACCGCCTCAGCTCTGTA   | 200 |
| Consensus             | cttcagtacgagatcttctagataccgcctcagctctgta   |     |
| HBC-3FLAG.CMV-F (H03) | TCGGGAAGCCTTAGAGTCTCCTGAGCATTGTTACCTCAC    | 279 |
| HBC_ORF               | TCGGGAAGCCTTAGAGTCTCCTGAGCATTGTTACCTCAC    | 240 |
| Consensus             | tccgggaagccttagagtctcctgagcattgttacctcac   |     |
| HBC-3FLAG.CMV-F (H03) | CATACTGCACTCAGGCAAGCAATTTCTTTGCTGGGGGGAAC  | 319 |
| HBC_ORF               | CATACTGCACTCAGGCAAGCAATTTCTTTGCTGGGGGGAAC  | 280 |
| Consensus             | catactgcactcaggcaagcaatttctttgctggggggaac  |     |
| HBC-3FLAG.CMV-F (H03) | TAATGACTCTAGCTACCTGGGTGGGTGTTAATTTGGAAGA   | 359 |
| HBC_ORF               | TAATGACTCTAGCTACCTGGGTGGGTGTTAATTTGGAAGA   | 320 |
| Consensus             | taatgactctagctacctgggtgggtgttaatttgggaaga  |     |
| HBC-3FLAG.CMV-F (H03) | TCCAGCATCTAGAGACCTAGTAGTCAGTTATGTCAACACT   | 399 |
| HBC_ORF               | TCCAGCATCTAGAGACCTAGTAGTCAGTTATGTCAACACT   | 360 |
| Consensus             | tccagcatctagagacctagtagtcagttatgtcaaacact  |     |
| HBC-3FLAG.CMV-F (H03) | AATATGGGCCTAAAGTTCAGGCAACTCTTGTGGTTTCACA   | 439 |
| HBC_ORF               | AATATGGGCCTAAAGTTCAGGCAACTCTTGTGGTTTCACA   | 400 |
| Consensus             | aatatgggcctaaagttcaggcaactcttgtggtttcaca   |     |
| HBC-3FLAG.CMV-F (H03) | TTTCTTGTCTCACTTTTGAAGAGAAACCGTTATAGAGTA    | 479 |
| HBC_ORF               | TTTCTTGTCTCACTTTTGAAGAGAAACCGTTATAGAGTA    | 440 |
| Consensus             | tttcttgtctcacttttgaagagaaaccgttatagagta    |     |
| HBC-3FLAG.CMV-F (H03) | TTTGGTGTCTTTCGGAGTGTGGATTTCGCACCTCCTCCAGCT | 519 |
| HBC_ORF               | TTTGGTGTCTTTCGGAGTGTGGATTTCGCACCTCCTCCAGCT | 480 |
| Consensus             | tttggtgtcttTCGGAGTgtggatttcgcactcctccagct  |     |
| HBC-3FLAG.CMV-F (H03) | TATAGACCACCAAATGCCCTATCCTATCAACACTTCCGG    | 559 |
| HBC_ORF               | TATAGACCACCAAATGCCCTATCCTATCAACACTTCCGG    | 520 |
| Consensus             | tatagaccaccaaatgccctatcctatcaaacacttccgg   |     |
| HBC-3FLAG.CMV-F (H03) | AAACTACTGTTGTTAGACGACGAGGCAGGTCCCCTAGAAG   | 599 |
| HBC_ORF               | AAACTACTGTTGTTAGACGACGAGGCAGGTCCCCTAGAAG   | 560 |
| Consensus             | aaactactgttgttagacgacgaggcaggtcccctagaag   |     |
| HBC-3FLAG.CMV-F (H03) | AAGAACTCCCTCGCCTCGCAGACGAAGGTCTCAATCGCCG   | 639 |
| HBC_ORF               | AAGAACTCCCTCGCCTCGCAGACGAAGGTCTCAATCGCCG   | 600 |
| Consensus             | aagaactcctcgcctcgcagacgaaggtctcaatcgccg    |     |
| HBC-3FLAG.CMV-F (H03) | CGTCGCAGAAGATCTCAATCTCGGGAACCTCAATGT       | 675 |
| HBC_ORF               | CGTCGCAGAAGATCTCAATCTCGGGAACCTCAATGT       | 636 |
| Consensus             | cgtcgcagaagatctcaatctcgggaacctcaatgt       |     |

| <b>Table S1. The list of differentially expressed protein between HBC and control</b> |                                                                          |               |
|---------------------------------------------------------------------------------------|--------------------------------------------------------------------------|---------------|
| <b>Gene names</b>                                                                     | <b>Description</b>                                                       |               |
| CDA                                                                                   | Cytidine deaminase                                                       | Downregulated |
| IFNGR1                                                                                | Interferon gamma receptor 1                                              | Downregulated |
| MVP                                                                                   | Major vault protein                                                      | Downregulated |
| RNF149                                                                                | E3 ubiquitin-protein ligase RNF149                                       | Downregulated |
| EPHA2                                                                                 | Ephrin type-A receptor 2                                                 | Downregulated |
| TAX1BP1                                                                               | Isoform 3 of Tax 1-binding protein 1                                     | Downregulated |
| S100A11                                                                               | Protein S100-A11                                                         | Downregulated |
| COTL1                                                                                 | Coactosin-like protein                                                   | Downregulated |
| TGFBR2                                                                                | TGF-beta receptor type-2                                                 | Downregulated |
| FBLIM1                                                                                | Filamin-binding LIM protein 1                                            | Downregulated |
| KRT19                                                                                 | Keratin, type I cytoskeletal 19                                          | Downregulated |
| APLP2                                                                                 | Isoform 5 of Amyloid-like protein 2                                      | Downregulated |
| PRKAR1A                                                                               | cAMP-dependent protein kinase type I-alpha regulatory subunit            | Downregulated |
| HP                                                                                    | Haptoglobin (Fragment)                                                   | Downregulated |
| STX3                                                                                  | Isoform B of Syntaxin-3                                                  | Downregulated |
| SQSTM1                                                                                | Isoform 2 of Sequestosome-1                                              | Downregulated |
| NCOA4                                                                                 | Nuclear receptor coactivator 4 (Fragment)                                | Downregulated |
| GPR126                                                                                | Isoform 2 of G-protein coupled receptor 126                              | Downregulated |
| AIM1                                                                                  | Absent in melanoma 1 protein                                             | Downregulated |
| SLC2A1                                                                                | Solute carrier family 2, facilitated glucose transporter member 1        | Downregulated |
| UBE2C                                                                                 | Isoform 3 of Ubiquitin-conjugating enzyme E2 C                           | Downregulated |
| SERPINA1                                                                              | Alpha-1-antitrypsin                                                      | Downregulated |
| PSAP                                                                                  | Proactivator polypeptide                                                 | Downregulated |
| CALCOCO2                                                                              | Isoform 5 of Calcium-binding and coiled-coil domain-containing protein 2 | Downregulated |
| NINJ1                                                                                 | Ninjurin-1                                                               | Downregulated |
| TACC1                                                                                 | Isoform 7 of Transforming acidic coiled-coil-containing protein 1        | Downregulated |
| SDCBP                                                                                 | Syntenin-1                                                               | Downregulated |
| TMEM30A                                                                               | Isoform 2 of Cell cycle control protein 50A                              | Downregulated |
| JAK1                                                                                  | Tyrosine-protein kinase JAK1                                             | Downregulated |
| KRT23                                                                                 | Keratin, type I cytoskeletal 23                                          | Downregulated |
| SNX17                                                                                 | Isoform 2 of Sorting nexin-17                                            | Downregulated |
| SH3BGRL                                                                               | SH3 domain-binding glutamic acid-rich-like protein                       | Downregulated |
| TRUB2                                                                                 | Probable tRNA pseudouridine synthase 2                                   | Downregulated |
| RHOB                                                                                  | Rho-related GTP-binding protein RhoB                                     | Downregulated |
| PPIC                                                                                  | Peptidyl-prolyl cis-trans isomerase C                                    | Downregulated |
| SLC1A4                                                                                | Isoform 2 of Neutral amino acid transporter A                            | Downregulated |

|          |                                                                   |               |
|----------|-------------------------------------------------------------------|---------------|
| RCN1     | Reticulocalbin-1                                                  | Downregulated |
| TMEM2    | Isoform 2 of Transmembrane protein 2                              | Downregulated |
| SLC7A2   | Low affinity cationic amino acid transporter 2                    | Downregulated |
| ATP2B4   | Isoform ZB of Plasma membrane calcium-transporting ATPase 4       | Downregulated |
| PI4K2A   | Phosphatidylinositol 4-kinase type 2-alpha                        | Downregulated |
| APOA2    | Apolipoprotein A-II                                               | Downregulated |
| SLC39A14 | Zinc transporter ZIP14 (Fragment)                                 | Downregulated |
| STXBP1   | Syntaxin-binding protein 1                                        | Downregulated |
| FGFR4    | Fibroblast growth factor receptor                                 | Downregulated |
| VAMP8    | Vesicle-associated membrane protein 8                             | Downregulated |
| SPRY4    | Protein sprouty homolog 4                                         | Downregulated |
| S100A6   | Protein S100-A6 (Fragment)                                        | Downregulated |
| C1GALT1  | Glycoprotein-N-acetylgalactosamine 3-beta-galactosyltransferase 1 | Downregulated |
| GIPC1    | PDZ domain-containing protein GIPC1                               | Downregulated |
| SH3BGRL3 | SH3 domain-binding glutamic acid-rich-like protein 3              | Downregulated |
| NPC1     | Niemann-Pick C1 protein                                           | Downregulated |
| SNX3     | Isoform 4 of Sorting nexin-3                                      | Downregulated |
| SLC30A1  | Zinc transporter 1                                                | Downregulated |
| SLC1A5   | Neutral amino acid transporter B(0)                               | Downregulated |
| F11R     | Junctional adhesion molecule A                                    | Downregulated |
| KYNU     | Kynureninase                                                      | Downregulated |
| ERBB3    | Receptor tyrosine-protein kinase erbB-3                           | Downregulated |
| IGF2R    | Cation-independent mannose-6-phosphate receptor                   | Downregulated |
| TCEB3    | Transcription elongation factor B polypeptide 3                   | Downregulated |
| SFN      | 14-3-3 protein sigma                                              | Downregulated |
| SLC38A2  | Sodium-coupled neutral amino acid transporter 2                   | Downregulated |
| ECE1     | Endothelin-converting enzyme 1                                    | Downregulated |
| HLA-A    | HLA class I histocompatibility antigen, A-69 alpha chain          | Downregulated |
| SQRDL    | Sulfide:quinone oxidoreductase, mitochondrial                     | Downregulated |
| FAT1     | Protocadherin Fat 1                                               | Downregulated |
| SERPINA3 | Alpha-1-antichymotrypsin                                          | Downregulated |
| TPT1     | Translationally-controlled tumor protein                          | Downregulated |
| PBXIP1   | Pre-B-cell leukemia transcription factor-interacting protein 1    | Downregulated |
| LGALS3BP | Galectin-3-binding protein                                        | Downregulated |
| GBA      | Glucosylceramidase                                                | Downregulated |
| LLGL1    | Lethal(2) giant larvae protein homolog 1                          | Downregulated |
| ABCC2    | Canalicular multispecific organic anion transporter 1             | Downregulated |
| TACC2    | Isoform 2 of Transforming acidic coiled-coil-containing protein 2 | Downregulated |
| B2M      | Beta-2-microglobulin                                              | Downregulated |
| ITCH     | Isoform 2 of E3 ubiquitin-protein ligase Itchy homolog            | Downregulated |

|          |                                                                                |               |
|----------|--------------------------------------------------------------------------------|---------------|
| VASP     | Vasodilator-stimulated phosphoprotein                                          | Downregulated |
| GUF1     | Translation factor GUF1, mitochondrial                                         | Downregulated |
| CAPG     | Macrophage-capping protein                                                     | Downregulated |
| KCTD10   | BTB/POZ domain-containing adapter for CUL3-mediated RhoA degradation protein 3 | Downregulated |
| OAT      | Ornithine aminotransferase, mitochondrial                                      | Downregulated |
| QTRT1    | Queuine tRNA-ribosyltransferase                                                | Upregulated   |
| SORBS2   | Isoform 9 of Sorbin and SH3 domain-containing protein 2                        | Upregulated   |
| C11orf54 | Ester hydrolase C11orf54 (Fragment)                                            | Upregulated   |
| CTSD     | Cathepsin D                                                                    | Upregulated   |
| HNMT     | Histamine N-methyltransferase                                                  | Upregulated   |
| PHKB     | Isoform 4 of Phosphorylase b kinase regulatory subunit beta                    | Upregulated   |
| LRWD1    | Leucine-rich repeat and WD repeat-containing protein 1                         | Upregulated   |
| EPHX2    | Isoform 2 of Bifunctional epoxide hydrolase 2                                  | Upregulated   |
| KTN1     | Kinectin                                                                       | Upregulated   |
| FNBP1    | Isoform 4 of Formin-binding protein 1                                          | Upregulated   |
| EPB49    | Dematin                                                                        | Upregulated   |
| FTCD     | Formimidoyltransferase-cyclodeaminase                                          | Upregulated   |
| AUH      | Isoform 2 of Methylglutaconyl-CoA hydratase, mitochondrial                     | Upregulated   |
| MYO1D    | Unconventional myosin-Id                                                       | Upregulated   |
| SAR1B    | GTP-binding protein SAR1b                                                      | Upregulated   |
| NFATC2   | Isoform 3 of Nuclear factor of activated T-cells, cytoplasmic 2                | Upregulated   |
| POR      | NADPH--cytochrome P450 reductase                                               | Upregulated   |
| PPP6R2   | Isoform 6 of Serine/threonine-protein phosphatase 6 regulatory subunit 2       | Upregulated   |
| PGK1     | Phosphoglycerate kinase 1                                                      | Upregulated   |
| SUN2     | SUN domain-containing protein 2                                                | Upregulated   |
| C7orf10  | Isoform 4 of CaiB/baiF CoA-transferase family protein C7orf10                  | Upregulated   |
| DDB2     | DNA damage-binding protein 2                                                   | Upregulated   |
| CBR4     | Carbonyl reductase family member 4                                             | Upregulated   |
| GALK1    | Galactokinase                                                                  | Upregulated   |
| SARDH    | Sarcosine dehydrogenase                                                        | Upregulated   |
| PECR     | Peroxisomal trans-2-enoyl-CoA reductase                                        | Upregulated   |
| CPT1A    | Carnitine O-palmitoyltransferase 1, liver isoform                              | Upregulated   |
| PDCD4    | Isoform 2 of Programmed cell death protein 4                                   | Upregulated   |
| RPS4Y1   | 40S ribosomal protein S4, Y isoform 1                                          | Upregulated   |
| FLNB     | Isoform 8 of Filamin-B                                                         | Upregulated   |
| CDK6     | Cyclin-dependent kinase 6                                                      | Upregulated   |
| ADH6     | Alcohol dehydrogenase 6                                                        | Upregulated   |
| PIPOX    | Peroxisomal sarcosine oxidase                                                  | Upregulated   |
| P4HA1    | Isoform 3 of Prolyl 4-hydroxylase subunit alpha-1                              | Upregulated   |
| CP       | Ceruloplasmin (Fragment)                                                       | Upregulated   |



|          |                                                                              |             |
|----------|------------------------------------------------------------------------------|-------------|
| TF       | Serotransferrin                                                              | Upregulated |
| DDAH2    | N(G),N(G)-dimethylarginine dimethylaminohydrolase 2                          | Upregulated |
| RBM33    | RNA-binding protein 33                                                       | Upregulated |
| KDM3A    | Lysine-specific demethylase 3A                                               | Upregulated |
| GBE1     | 1,4-alpha-glucan-branching enzyme                                            | Upregulated |
| GLB1     | Isoform 3 of Beta-galactosidase                                              | Upregulated |
| LDHA     | L-lactate dehydrogenase A chain                                              | Upregulated |
| WBP4     | WW domain-binding protein 4                                                  | Upregulated |
| KDM5C    | Isoform 4 of Lysine-specific demethylase 5C                                  | Upregulated |
| FBXO7    | Isoform 3 of F-box only protein 7                                            | Upregulated |
| PHYH     | Phytanoyl-CoA dioxygenase, peroxisomal                                       | Upregulated |
| PLIN2    | Perilipin-2                                                                  | Upregulated |
| FAM162A  | Protein FAM162A                                                              | Upregulated |
| SEC24A   | Protein transport protein Sec24A                                             | Upregulated |
| AKR1C3   | Aldo-keto reductase family 1 member C3                                       | Upregulated |
| DAK      | Bifunctional ATP-dependent dihydroxyacetone kinase/FAD-AMP lyase (cyclizing) | Upregulated |
| CISD3    | CDGSH iron-sulfur domain-containing protein 3, mitochondrial                 | Upregulated |
| PEG3     | Isoform 2 of Paternally-expressed gene 3 protein                             | Upregulated |
| DDC      | Isoform 3 of Aromatic-L-amino-acid decarboxylase                             | Upregulated |
| SERPINB9 | Serpin B9                                                                    | Upregulated |
| AOX1     | Aldehyde oxidase                                                             | Upregulated |
| PPFIBP2  | Liprin-beta-2                                                                | Upregulated |
| ALDOC    | Fructose-bisphosphate aldolase C                                             | Upregulated |
| BCAP31   | B-cell receptor-associated protein 31                                        | Upregulated |
| APOL2    | Apolipoprotein L2                                                            | Upregulated |
| SORBS1   | Isoform 4 of Sorbin and SH3 domain-containing protein 1                      | Upregulated |
| ANXA13   | Annexin A13                                                                  | Upregulated |
| AKR1D1   | Isoform 2 of 3-oxo-5-beta-steroid 4-dehydrogenase                            | Upregulated |
| IL1RN    | Isoform 4 of Interleukin-1 receptor antagonist protein                       | Upregulated |
| BHMT2    | Isoform 2 of S-methylmethionine--homocysteine S-methyltransferase BHMT2      | Upregulated |
| SOD1     | Superoxide dismutase [Cu-Zn]                                                 | Upregulated |
| GSTA4    | Glutathione S-transferase A4                                                 | Upregulated |
| CKAP4    | Cytoskeleton-associated protein 4                                            | Upregulated |
| PDZK1    | Na(+)/H(+) exchange regulatory cofactor NHE-RF3                              | Upregulated |
| CYP4F11  | Cytochrome P450 4F11                                                         | Upregulated |
| AKR1B10  | Aldo-keto reductase family 1 member B10                                      | Upregulated |
| PTGR1    | Isoform 2 of Prostaglandin reductase 1                                       | Upregulated |
| NADKD1   | NAD kinase 2, mitochondrial                                                  | Upregulated |
| CES1     | Liver carboxylesterase 1                                                     | Upregulated |
| GNPAT    | Dihydroxyacetone phosphate acyltransferase                                   | Upregulated |

|         |                                                         |             |
|---------|---------------------------------------------------------|-------------|
| EBAG9   | Receptor-binding cancer antigen-expressed on SiSo cells | Upregulated |
| AGXT    | Serine--pyruvate aminotransferase                       | Upregulated |
| AGPS    | Alkyldihydroxyacetonephosphate synthase, peroxisomal    | Upregulated |
| ALDH1L1 | Cytosolic 10-formyltetrahydrofolate dehydrogenase       | Upregulated |
| BHMT    | Betaine--homocysteine S-methyltransferase 1             | Upregulated |
| NDRG1   | Protein NDRG1                                           | Upregulated |
| ENTPD5  | Ectonucleoside triphosphate diphosphohydrolase 5        | Upregulated |
| PCK1    | Phosphoenolpyruvate carboxykinase, cytosolic [GTP]      | Upregulated |
| ALCAM   | CD166 antigen (Fragment)                                | Upregulated |
| ARG1    | Arginase-1                                              | Upregulated |

**Table S2. NMR data for the metabolites assignment**

| Number | CAS No    | Metabolites                | $\delta$ $^1\text{H}$ and multiplicity                                          | Proton groups                                                                                                                                                                                  | P-Value |
|--------|-----------|----------------------------|---------------------------------------------------------------------------------|------------------------------------------------------------------------------------------------------------------------------------------------------------------------------------------------|---------|
| 1      |           | Unknown1                   | 0.90(s)<br>0.94(s)                                                              | $\text{CH}_3$<br>$\text{CH}_3$                                                                                                                                                                 | 0.84    |
| 2      | 73-32-5   | Isoleucine                 | 0.94 (t)<br>1.01 (d)<br>1.28(m)<br>1.46 (m)<br>1.98 (m)<br>3.67 (dd)            | $\delta\text{-CH}_3$<br>$\gamma'\text{-CH}_3$<br>half $\gamma\text{-CH}_2$<br>half $\gamma\text{-CH}_2$<br>$\beta\text{-CH}$<br>$\alpha\text{-CH}$                                             | 0.96    |
| 3      | 61-90-5   | Leucine                    | 0.95 (d)<br>0.96 (d)<br>1.70(m)<br>1.72 (m)<br>3.76 (d)                         | $\delta\text{-CH}_3$<br>$\delta'\text{-CH}_3$<br>$\gamma\text{-CH}$<br>$\beta\text{-CH}_2$<br>$\alpha\text{-CH}$                                                                               | 0.94    |
| 4      | 72-18-4   | Valine                     | 0.99 (d)<br>1.05 (d)<br>2.27 (m)<br>3.61 (d)                                    | $\gamma'\text{-CH}_3$<br>$\gamma\text{-CH}_3$<br>$\beta\text{-CH}$<br>$\alpha\text{-CH}$                                                                                                       | 0.96    |
| 5      | 79-33-4   | Lactate                    | 1.33 (d)<br>4.12 (q)                                                            | $\beta\text{-CH}_3$<br>$\alpha\text{-CH}$                                                                                                                                                      | 0.92    |
| 6      | 72-19-5   | Threonine                  | 1.33 (d)<br>3.58 (d)<br>4.26 (m)                                                | $\gamma\text{-CH}_3$<br>$\alpha\text{-CH}$<br>$\beta\text{-CH}_2$                                                                                                                              | 0.98    |
| 7      | 56-87-1   | Lysine                     | 1.44 (m)<br>1.49 (m)<br>1.72 (m)<br>1.92 (m)<br>3.04 (t)<br>3.74 (t)            | Half $\text{-CH}_2$<br>Half $\text{-CH}_2$<br>$\gamma\text{-CH}_2$<br>$\beta\text{-CH}_2$<br>$\text{-CH}_2$<br>$\alpha\text{-CH}$                                                              | 0.87    |
| 8      | 56-41-7   | Alanine                    | 1.48(d)<br>3.80 (q)                                                             | $\beta\text{-CH}_3$<br>$\alpha\text{-CH}$                                                                                                                                                      | 0.98    |
| 9      |           | N-acetylated glycoproteins | 2.02 (s)                                                                        | $\text{CH}_3$                                                                                                                                                                                  | 0.79    |
| 10     | 7512-17-6 | GlcNAc                     | 2.08 (s)<br>3.46<br>3.46<br>3.53<br>3.67<br>3.76<br>4.71<br>3.85 (m)<br>5.21(d) | NA-H<br>$\alpha\text{-C4H}$<br>$\beta\text{-C4,5H}$<br>$\beta\text{-C3H}$<br>$\beta\text{-C2H}$<br>$\alpha\text{-C3H}$<br>$\beta\text{-C1H}$<br>$\alpha\text{-C2,5,6H}$<br>$\alpha\text{-C1H}$ | -0.66   |

|    |           |                      |                                                                                   |                                                                                                      |      |
|----|-----------|----------------------|-----------------------------------------------------------------------------------|------------------------------------------------------------------------------------------------------|------|
| 11 | 6893-26-1 | Glutamate            | 2.08(m)<br>2.35(m)<br>3.76(m)                                                     | $\beta$ -CH <sub>2</sub><br>$\gamma$ -CH <sub>2</sub><br>$\alpha$ -CH                                | 0.84 |
| 12 | 70-18-8   | Glutathione          | 2.16(m)<br>2.56(m)<br>2.95(m)<br>3.78(t)<br>4.59(dd)                              | Glu $\beta$<br>Glu $\gamma$<br>Cys $\beta$<br>Glu $\alpha$<br>Cys $\alpha$                           | 0.96 |
| 13 | 110-15-6  | Succinate            | 2.41(s)                                                                           | CH <sub>2</sub>                                                                                      | 0.94 |
| 14 | 56-84-8   | Aspartate            | 2.69(dd)<br>2.81(dd)<br>3.90(m)                                                   | $\beta$ -CH<br>$\beta'$ -CH<br>$\alpha$ -CH                                                          | 0.82 |
| 15 |           | Unknown2             | 2.98(m)<br>3.34(t)<br>4.79                                                        |                                                                                                      | 0.96 |
| 16 | 57-00-1   | Creatine             | 3.04(s)<br>3.93(s)                                                                | CH <sub>3</sub><br>CH <sub>2</sub>                                                                   | 0.95 |
| 17 | 60-18-4   | Tyrosine             | 3.08<br>3.95(dd)<br>6.91(d)<br>7.20(d)                                            | $\beta$ -CH <sub>2</sub><br>$\alpha$ -CH<br>C3,5H,ring<br>C2,6H,ring                                 | 0.86 |
| 18 | 62-49-7   | Choline              | 3.21(s)<br>3.56(m)<br>3.99(m)                                                     | N-CH <sub>3</sub><br>$\beta$ -CH <sub>2</sub><br>$\alpha$ -CH <sub>2</sub>                           | 0.73 |
| 19 | 3616-04-4 | Phosphocholine       | 3.22(s)<br>3.60(m)<br>4.17(m)                                                     | N-CH <sub>3</sub><br>$\alpha$ -CH <sub>2</sub><br>$\beta$ -CH <sub>2</sub>                           | 0.97 |
| 20 | 492-61-5  | $\beta$ -Glucose     | 3.24 (m)<br>3.39 (t)<br>3.47 (m)<br>3.48 (t)<br>3.72 (m)<br>3.89 (dd)<br>4.64 (d) | 2-CHOH<br>4-CHOH<br>5-CHOH<br>3-CHOH<br>half-CH <sub>2</sub> OH<br>half-CH <sub>2</sub> OH<br>1-CHOH | 0.94 |
| 21 | 87-89-8   | <i>myo</i> -Inositol | 3.26(t)<br>3.54(dd)<br>3.62(t)<br>4.06(t)                                         | C5H<br>C1,3H<br>C4,6H<br>C2H                                                                         | 0.36 |
| 22 | 107-35-7  | Taurine              | 3.27(t)<br>3.43(t)                                                                | N-CH <sub>2</sub><br>S-CH <sub>2</sub>                                                               | 0.55 |
| 23 | 492-62-6  | $\alpha$ -Glucose    | 3.40 (t)<br>3.53 (dd)<br>3.71 (t)<br>3.75 (m)                                     | 4-CHOH<br>2-CHOH<br>3-CHOH<br>half-CH <sub>2</sub> OH                                                | 0.67 |

|    |            |                        |              |                           |      |
|----|------------|------------------------|--------------|---------------------------|------|
|    |            |                        | 3.83 (m)     | half-CH <sub>2</sub> OH   |      |
|    |            |                        | 3.83 (m)     | 5-CHOH                    |      |
|    |            |                        | 5.23 (d)     | 1-CHOH                    |      |
| 24 | 812-00-0   | Monomethylphosphate    | 3.47(d)      | CH <sub>3</sub>           | 0.34 |
| 25 | 28053-08-9 | UDP-Glc                | 3.47         | G5-H                      | 0.81 |
|    |            |                        | 3.54         | G4-H                      |      |
|    |            |                        | 3.77         | G3-H                      |      |
|    |            |                        | 3.90         | G2-H                      |      |
|    |            |                        | 3.86/3.78    | G6-H                      |      |
|    |            |                        | 4.26/4.21(m) | C5'H,ribose               |      |
|    |            |                        | 4.29(m)      | C4',ribose                |      |
|    |            |                        | 4.38(m)      | C2'3'H,ribose             |      |
|    |            |                        | 5.61         | G1-H                      |      |
|    |            |                        | 5.98(d)      | C5,ring                   |      |
|    |            |                        | 5.99(d)      | C1'H,ribose               |      |
|    |            |                        | 7.96(d)      | C6,ring                   |      |
| 26 | 63700-19-6 | UDP-GlcA               | 3.51(dd)     | G3-H                      | 0.97 |
|    |            |                        | 3.59(m)      | G4-H                      |      |
|    |            |                        | 3.79(dd)     | G2-H                      |      |
|    |            |                        | 4.14(dd)     | G5-H                      |      |
|    |            |                        | 4.25/4.19    | C5'H,ribose               |      |
|    |            |                        | 4.29(m)      | C4'H,ribose               |      |
|    |            |                        | 4.38(m)      | C2'3'H,ribose             |      |
|    |            |                        | 5.62         | G1-H                      |      |
|    |            |                        | 5.98(d)      | C5,ring                   |      |
|    |            |                        | 6.00(d)      | C1'H,ribose               |      |
|    |            |                        | 7.95(d)      | C6,ring                   |      |
| 27 | 56-40-6    | Glycine                | 3.56(s)      | $\alpha$ -CH <sub>2</sub> | 0.92 |
| 28 | 28319-77-9 | Glycerolphosphocholine | 3.60(dd)     | 1-CH <sub>2</sub>         | 0.98 |
|    |            |                        | 3.89(m)      | 2-CH                      |      |
|    |            |                        | 3.77(dd)     | 3-CH <sub>2</sub>         |      |
|    |            |                        | 4.32(t)      | $\alpha$ -CH <sub>2</sub> |      |
|    |            |                        | 3.68(t)      | $\beta$ -CH <sub>2</sub>  |      |
|    |            |                        | 3.23(s)      | N-CH <sub>3</sub>         |      |
| 29 | 118-00-3   | Guanosine              | 3.84         | CH5-ribose                | 0.72 |
|    |            |                        | 4.24(dt)     | CH4-ribose                |      |
|    |            |                        | 4.41(dd)     | CH3-ribose                |      |
|    |            |                        | 5.92(d)      | CH1-ribose                |      |
|    |            |                        | 8.00(s)      | CH-ring                   |      |
| 30 | 58-63-9    | Inosine                | 3.87(dd)     | CH5-ribose                | 0.89 |
|    |            |                        | 4.28(dt)     | CH4-ribose                |      |
|    |            |                        | 4.44(dd)     | CH3-ribose                |      |
|    |            |                        | 4.78(dd)     | CH2-ribose                |      |
|    |            |                        | 6.10(d)      | CH1-ribose                |      |

|         |             |            |              |               |         |         |             |            |      |
|---------|-------------|------------|--------------|---------------|---------|---------|-------------|------------|------|
| 31      | 91183-98-1  | UDP-GlcNAc | 8.24(s)      | CH-ring       | 0.74    |         |             |            |      |
|         |             |            | 8.35(s)      | CH-ring       |         |         |             |            |      |
|         |             |            | 3.87         | G6-H          |         |         |             |            |      |
|         |             |            | 3.93         | G5-H          |         |         |             |            |      |
|         |             |            | 2.08(s)      | NA-H          |         |         |             |            |      |
|         |             |            | 3.55(dd)     | G4-H          |         |         |             |            |      |
|         |             |            | 3.82(m)      | G3-H          |         |         |             |            |      |
|         |             |            | 3.99(m)      | G2-H          |         |         |             |            |      |
|         |             |            | 4.25/4.19(m) | C5'H,ribose   |         |         |             |            |      |
|         |             |            | 4.29(m)      | C4'H,ribose   |         |         |             |            |      |
|         |             |            | 4.37(m)      | C2'3'H,ribose |         |         |             |            |      |
|         |             |            | 5.52(dd)     | G1-H          |         |         |             |            |      |
|         |             |            | 5.97(d)      | C5,ring       |         |         |             |            |      |
|         |             |            | 5.98(d)      | C1'H,ribose   |         |         |             |            |      |
|         |             |            | 7.96(d)      | C6,ring       |         |         |             |            |      |
| 32      | 108320-87-2 | UDP-GalNAc | 3.78         | G6-H          | -0.73   |         |             |            |      |
|         |             |            | 3.79         | G5-H          |         |         |             |            |      |
|         |             |            | 2.09(s)      | NA-H          |         |         |             |            |      |
|         |             |            | 3.76(m)      | G4-H          |         |         |             |            |      |
|         |             |            | 3.97(dd)     | G3-H          |         |         |             |            |      |
|         |             |            | 4.05(m)      | G2-H          |         |         |             |            |      |
|         |             |            | 4.25/4.19(m) | C5'H,ribose   |         |         |             |            |      |
|         |             |            | 4.29(m)      | C4',ribose    |         |         |             |            |      |
|         |             |            | 4.37(m)      | C2'3'H,ribose |         |         |             |            |      |
|         |             |            | 5.55(dd)     | G1-H          |         |         |             |            |      |
|         |             |            | 5.97(d)      | C5,ring       |         |         |             |            |      |
|         |             |            | 5.99(d)      | C1'H,ribose   |         |         |             |            |      |
|         |             |            | 7.96(d)      | C6,ring       |         |         |             |            |      |
|         |             |            | 33           | 58-64-0       |         | ADP     | 4.01(m)     | C5H-ribose | 0.66 |
|         |             |            |              |               |         |         | 4.38(m)     | C4H-ribose |      |
| 4.51(m) | C3H-ribose  |            |              |               |         |         |             |            |      |
| 4.61(m) | C2H-ribose  |            |              |               |         |         |             |            |      |
| 6.14(d) | C1H-ribose  |            |              |               |         |         |             |            |      |
| 8.27(s) | CH-ring     |            |              |               |         |         |             |            |      |
| 8.54(s) | CH-ring     |            |              |               |         |         |             |            |      |
| 34      | 74431-23-5  | IMP        |              |               | 4.03(m) |         | CH5-ribose  | 0.32       |      |
|         |             |            |              |               | 4.77    |         | CH2-ribose  |            |      |
|         |             |            | 4.37(dt)     | CH4-ribose    |         |         |             |            |      |
|         |             |            | 4.51(dd)     | CH3-ribose    |         |         |             |            |      |
|         |             |            | 6.14(d)      | CH1-ribose    |         |         |             |            |      |
|         |             |            | 8.22(s)      | CH-ring       |         |         |             |            |      |
|         |             |            | 8.61(s)      | CH-ring       |         |         |             |            |      |
|         |             |            | 35           | 58-96-8       | Uridine | 4.12(q) | C5'H,ribose |            | 0.44 |
|         |             |            |              |               |         | 4.23(t) | C4'H,ribose |            |      |

|    |          |               |                |             |      |
|----|----------|---------------|----------------|-------------|------|
|    |          |               | 4.34(t)        | C3'H,ribose |      |
|    |          |               | 5.90(d)        | C5,ring     |      |
|    |          |               | 5.92(d)        | C1'H,ribose |      |
|    |          |               | 7.88(d)        | C6,ring     |      |
| 36 | 53-84-9  | NAD           | 4.21/4.24      | A5'H2       | 0.67 |
|    |          |               | 4.23/4.36      | N5'H2       |      |
|    |          |               | 4.37           | A2'H        |      |
|    |          |               | 4.43           | N3'H        |      |
|    |          |               | 4.48           | N2'H        |      |
|    |          |               | 4.51           | A3'H        |      |
|    |          |               | 4.55           | N4'H        |      |
|    |          |               | 6.04(d)        | A1'H        |      |
|    |          |               | 6.09(d)        | N1'H        |      |
|    |          |               | 8.18(s)        | A2Hring     |      |
|    |          |               | 8.20(m)        | N5ring      |      |
|    |          |               | 8.43(s)        | A8H ring    |      |
|    |          |               | 8.83(d)        | N4ring      |      |
|    |          |               | 9.15(d)        | N6ring      |      |
|    |          |               | 9.34(s)        | N2ring      |      |
| 37 | 58-98-0  | UDP           | 4.23(dd)       | CH5-ribose  | 0.28 |
|    |          |               | 4.27(m)        | CH4-ribose  |      |
|    |          |               | 4.39(t)        | CH2-ribose  |      |
|    |          |               | 4.43(t)        | CH3-ribose  |      |
|    |          |               | 5.96(broad, s) | CH1-ribose  |      |
|    |          |               | 5.98(d)        | CH-ring     |      |
|    |          |               | 8.00(d)        | CH-ring     |      |
| 38 | 66-22-8  | Uracil        | 5.80(d)        | C5H         | 0.30 |
|    |          |               | 7.54(d)        | C6H         |      |
| 39 | 110-17-8 | Fumarate      | 6.52(s)        | C2,3H       | 0.82 |
| 40 | 71-00-1  | Histidine     | 7.10(s)        | C4H,ring    | 0.33 |
|    |          |               | 7.86(s)        | C2H,ring    |      |
| 41 | 63-91-2  | Phenylalanine | 7.33(m)        | C2,6,ring   | 0.94 |
|    |          |               | 7.38(m)        | C4,ring     |      |
|    |          |               | 7.42(m)        | C3,5,ring   |      |
| 42 | 73-22-3  | Tryptophan    | 7.55(d)        | C7H,ring    | 0.73 |
|    |          |               | 7.74(d)        | C4H,ring    |      |
| 43 | 64-18-6  | Formate       | 8.46 (s)       | HCOO        | 0.76 |

Note: s, singlet; d, doublet; t, triplet; q, quartet; m, multiplet; b, broad peak; dd, doublet of doublets

**Table S3. The list the interacting protein of HBC**

| Gene names | Intensity 3Flag-1 | Intensity HBC-1 | LOG10-3Flag-1 | LOG10-HBC-1 | Intensity 3Flag-2 | Intensity HBC-2 | LOG10-3Flag-2 | LOG10-HBC-2 | HBC1-FLAG1 | HBC2-FLAG2 |
|------------|-------------------|-----------------|---------------|-------------|-------------------|-----------------|---------------|-------------|------------|------------|
| HBCORF     | 0                 | 14530000        | 0.00          | 8.16        | 0                 | 122060000       | 0.00          | 8.09        | 8.16       | 8.09       |
| ALDOB      | 0                 | 32049000        | 0.00          | 7.51        | 0                 | 13401000        | 0.00          | 7.13        | 7.51       | 7.13       |
| ASS1       | 0                 | 62940000        | 0.00          | 7.80        | 0                 | 6821500         | 0.00          | 6.83        | 7.80       | 6.83       |
| GDI2       | 0                 | 517140          | 0.00          | 5.71        | 0                 | 4711900         | 0.00          | 6.67        | 5.71       | 6.67       |
| MDH1       | 0                 | 2382700         | 0.00          | 6.38        | 0                 | 4514800         | 0.00          | 6.65        | 6.38       | 6.65       |
| BHMT       | 0                 | 11231000        | 0.00          | 7.05        | 0                 | 4467700         | 0.00          | 6.65        | 7.05       | 6.65       |
| PSAT1      | 0                 | 1038800         | 0.00          | 6.02        | 0                 | 3908100         | 0.00          | 6.59        | 6.02       | 6.59       |
| HIST1H1C   | 0                 | 4264800         | 0.00          | 6.63        | 0                 | 3884400         | 0.00          | 6.59        | 6.63       | 6.59       |
| ALDH1L1    | 0                 | 7595700         | 0.00          | 6.88        | 0                 | 3509200         | 0.00          | 6.55        | 6.88       | 6.55       |
| SARDH      | 0                 | 8760300         | 0.00          | 6.94        | 0                 | 2866100         | 0.00          | 6.46        | 6.94       | 6.46       |
| ASL        | 0                 | 7761800         | 0.00          | 6.89        | 0                 | 2385900         | 0.00          | 6.38        | 6.89       | 6.38       |
| NQO1       | 0                 | 2197700         | 0.00          | 6.34        | 0                 | 2344000         | 0.00          | 6.37        | 6.34       | 6.37       |
| OTC        | 0                 | 6147100         | 0.00          | 6.79        | 0                 | 1707900         | 0.00          | 6.23        | 6.79       | 6.23       |
| KRT13      | 0                 | 1183000         | 0.00          | 6.07        | 0                 | 1523500         | 0.00          | 6.18        | 6.07       | 6.18       |
| NME1       | 0                 | 845770          | 0.00          | 5.93        | 0                 | 1479800         | 0.00          | 6.17        | 5.93       | 6.17       |
| GNNMT      | 0                 | 5466600         | 0.00          | 6.74        | 0                 | 1456000         | 0.00          | 6.16        | 6.74       | 6.16       |
| MLX        | 0                 | 1102900         | 0.00          | 6.04        | 0                 | 1403700         | 0.00          | 6.15        | 6.04       | 6.15       |
| CYB5A      | 0                 | 6275900         | 0.00          | 6.80        | 0                 | 1055300         | 0.00          | 6.02        | 6.80       | 6.02       |
| SSB        | 0                 | 270230          | 0.00          | 5.43        | 0                 | 1051400         | 0.00          | 6.02        | 5.43       | 6.02       |
| CA3        | 0                 | 3528800         | 0.00          | 6.55        | 0                 | 1039300         | 0.00          | 6.02        | 6.55       | 6.02       |
| ALDH6A1    | 0                 | 2625100         | 0.00          | 6.42        | 0                 | 1039300         | 0.00          | 6.02        | 6.42       | 6.02       |
| UROCI      | 0                 | 1179900         | 0.00          | 6.07        | 0                 | 1038300         | 0.00          | 6.02        | 6.07       | 6.02       |
| HPD        | 0                 | 3251800         | 0.00          | 6.51        | 0                 | 1027400         | 0.00          | 6.01        | 6.51       | 6.01       |
| EIF3M      | 0                 | 30215           | 0.00          | 4.48        | 0                 | 885050          | 0.00          | 5.95        | 4.48       | 5.95       |
| HMGCS2     | 0                 | 3620900         | 0.00          | 6.56        | 0                 | 860500          | 0.00          | 5.93        | 6.56       | 5.93       |
| GOT1       | 0                 | 3046500         | 0.00          | 6.48        | 0                 | 851710          | 0.00          | 5.93        | 6.48       | 5.93       |
| PAICS      | 0                 | 341650          | 0.00          | 5.53        | 0                 | 814660          | 0.00          | 5.91        | 5.53       | 5.91       |
| ANXA11     | 0                 | 79907           | 0.00          | 4.90        | 0                 | 730230          | 0.00          | 5.86        | 4.90       | 5.86       |
| DAK        | 0                 | 2075400         | 0.00          | 6.32        | 0                 | 631470          | 0.00          | 5.80        | 6.32       | 5.80       |



|          |   |         |      |      |   |        |      |      |      |      |      |
|----------|---|---------|------|------|---|--------|------|------|------|------|------|
| FBXO2    | 0 | 81178   | 0.00 | 4.91 | 0 | 578720 | 0.00 | 5.76 | 4.91 | 5.76 | 5.76 |
| ARF1     | 0 | 1322900 | 0.00 | 6.12 | 0 | 559030 | 0.00 | 5.75 | 6.12 | 5.75 | 5.75 |
| PYGL     | 0 | 3411700 | 0.00 | 6.53 | 0 | 556110 | 0.00 | 5.75 | 6.53 | 5.75 | 5.75 |
| ACTR2    | 0 | 335310  | 0.00 | 5.53 | 0 | 552960 | 0.00 | 5.74 | 5.53 | 5.74 | 5.74 |
| HSPE1    | 0 | 152930  | 0.00 | 5.18 | 0 | 527130 | 0.00 | 5.72 | 5.18 | 5.72 | 5.72 |
| GART     | 0 | 499170  | 0.00 | 5.70 | 0 | 515660 | 0.00 | 5.71 | 5.70 | 5.71 | 5.71 |
| SEC31A   | 0 | 28299   | 0.00 | 4.45 | 0 | 493220 | 0.00 | 5.69 | 4.45 | 5.69 | 5.69 |
| ALDH4A1  | 0 | 1692300 | 0.00 | 6.23 | 0 | 482710 | 0.00 | 5.68 | 6.23 | 5.68 | 5.68 |
| RPS4Y1   | 0 | 1513200 | 0.00 | 6.18 | 0 | 456880 | 0.00 | 5.66 | 6.18 | 5.66 | 5.66 |
| RPS6KA3  | 0 | 88319   | 0.00 | 4.95 | 0 | 453220 | 0.00 | 5.66 | 4.95 | 5.66 | 5.66 |
| MGST1    | 0 | 2304000 | 0.00 | 6.36 | 0 | 425760 | 0.00 | 5.63 | 6.36 | 5.63 | 5.63 |
| RGN      | 0 | 489560  | 0.00 | 5.69 | 0 | 392550 | 0.00 | 5.59 | 5.69 | 5.59 | 5.59 |
| GNPNAT1  | 0 | 689190  | 0.00 | 5.84 | 0 | 364110 | 0.00 | 5.56 | 5.84 | 5.56 | 5.56 |
| EIF2B4   | 0 | 52792   | 0.00 | 4.72 | 0 | 343230 | 0.00 | 5.54 | 4.72 | 5.54 | 5.54 |
| DECR1    | 0 | 717140  | 0.00 | 5.86 | 0 | 333020 | 0.00 | 5.52 | 5.86 | 5.52 | 5.52 |
| SERPINA7 | 0 | 123100  | 0.00 | 5.09 | 0 | 316300 | 0.00 | 5.50 | 5.09 | 5.50 | 5.50 |
| ACSL1    | 0 | 2523300 | 0.00 | 6.40 | 0 | 275340 | 0.00 | 5.44 | 6.40 | 5.44 | 5.44 |
| ACTN1    | 0 | 680670  | 0.00 | 5.83 | 0 | 253280 | 0.00 | 5.40 | 5.83 | 5.40 | 5.40 |
| NDUFA4   | 0 | 870930  | 0.00 | 5.94 | 0 | 240370 | 0.00 | 5.38 | 5.94 | 5.38 | 5.38 |
| APRT     | 0 | 229360  | 0.00 | 5.36 | 0 | 237930 | 0.00 | 5.38 | 5.36 | 5.38 | 5.38 |
| MCM5     | 0 | 306880  | 0.00 | 5.49 | 0 | 229330 | 0.00 | 5.36 | 5.49 | 5.36 | 5.36 |
| ATP5O    | 0 | 2216000 | 0.00 | 6.35 | 0 | 226120 | 0.00 | 5.35 | 6.35 | 5.35 | 5.35 |
| ANPEP    | 0 | 1780300 | 0.00 | 6.25 | 0 | 221350 | 0.00 | 5.35 | 6.25 | 5.35 | 5.35 |
| DCXR     | 0 | 380060  | 0.00 | 5.58 | 0 | 191430 | 0.00 | 5.28 | 5.58 | 5.28 | 5.28 |
| CASP3    | 0 | 205370  | 0.00 | 5.31 | 0 | 182150 | 0.00 | 5.26 | 5.31 | 5.26 | 5.26 |
| SNRNP2   | 0 | 115180  | 0.00 | 5.06 | 0 | 180010 | 0.00 | 5.26 | 5.06 | 5.26 | 5.26 |
| CTSB     | 0 | 597910  | 0.00 | 5.78 | 0 | 158950 | 0.00 | 5.20 | 5.78 | 5.20 | 5.20 |
| MTCH2    | 0 | 183350  | 0.00 | 5.26 | 0 | 157310 | 0.00 | 5.20 | 5.26 | 5.20 | 5.20 |
| NDRG2    | 0 | 190920  | 0.00 | 5.28 | 0 | 156130 | 0.00 | 5.19 | 5.28 | 5.19 | 5.19 |
| DADI     | 0 | 50090   | 0.00 | 4.70 | 0 | 153770 | 0.00 | 5.19 | 4.70 | 5.19 | 5.19 |
| DIS3     | 0 | 35672   | 0.00 | 4.55 | 0 | 117960 | 0.00 | 5.07 | 4.55 | 5.07 | 5.07 |
| SRP19    | 0 | 146910  | 0.00 | 5.17 | 0 | 114220 | 0.00 | 5.06 | 5.17 | 5.06 | 5.06 |

|        |   |        |      |      |   |        |      |      |      |      |
|--------|---|--------|------|------|---|--------|------|------|------|------|
| ACOX1  | 0 | 538340 | 0.00 | 5.73 | 0 | 113350 | 0.00 | 5.05 | 5.73 | 5.05 |
| DSTN   | 0 | 75271  | 0.00 | 4.88 | 0 | 103150 | 0.00 | 5.01 | 4.88 | 5.01 |
| SHMT1  | 0 | 194580 | 0.00 | 5.29 | 0 | 99368  | 0.00 | 5.00 | 5.29 | 5.00 |
| HIF0   | 0 | 349740 | 0.00 | 5.54 | 0 | 85276  | 0.00 | 4.93 | 5.54 | 4.93 |
| PPPICC | 0 | 385970 | 0.00 | 5.59 | 0 | 69033  | 0.00 | 4.84 | 5.59 | 4.84 |
| GLG1   | 0 | 938180 | 0.00 | 5.97 | 0 | 64927  | 0.00 | 4.81 | 5.97 | 4.81 |
| PAH    | 0 | 888920 | 0.00 | 5.95 | 0 | 42250  | 0.00 | 4.63 | 5.95 | 4.63 |

**Table S4. Primer Sequences for ChIP**

| <b>Gene</b>   | <b>Primer number</b> | <b>ChIP primer F</b>        | <b>ChIP primer R</b>       | <b>MLX binding motif</b> |
|---------------|----------------------|-----------------------------|----------------------------|--------------------------|
| <b>CES1</b>   | CES1-1               | GCTGTGAGAGCATCCTCATTC       | TGCCCCAAGGCCATGAGTTGTAG    | CACGTG                   |
|               | CES1-2               | TGGGTACTTGGATGGATGGATG      | CATCGGTGCAGAGAACTCACT      | TGATAA                   |
| <b>NPC1</b>   | NPC1-1               | ACTCGGGATCGTCACA            | CTTCTCTCCCAACCCAGTC        | CGGGCT                   |
|               | NPC1-2               | CTCAGCGTAATTGTCGGAGCC       | GCGAGGTTTCAGCGAAGGGT       | CCGGAAGT                 |
| <b>AKR1D1</b> | AKR1D1-1             | ATGCTGAGTGAAAGAAGCCAATCTC   | GAACTCTATCCTATCACACCCCTCCC | TGATAA                   |
|               | AKR1D1-2             | GCCATGTTATTGTTCCCTCTAGTCCA  | AGCAGGACTGGAAGGGATCTAGG    | TGATAA                   |
| <b>PCK1</b>   | PCK1-1               | ACTGGAACTGTCTATGTGGCACTT    | CCCACCCTGATGTTAGAGTATTTGG  | TGATAA                   |
|               | PCK1-2               | TGTTTCTTAGGCAAGATAGCTCCAT   | TGCCACAACAGATAGAGAGACCCAT  | CACGTG                   |
|               | PCK1-3               | ATCCTGAAAGACACAACTGGCTGAA   | GGCGTGGTCCACACATCATCAA     | TGATAA                   |
| <b>PSAP</b>   | PSAP-1               | GGATTACAGGAGTGAGCCAGCAT     | AAGTAGTCGTGTAAACAGGGTACAGG | CACGTG                   |
| <b>SORBS1</b> | SORBS1-1             | GCCAGGACGGAAAGGGTTACTAGG    | CGGATGGGAGGCGAAGAAGTGT     | CGGGCTC                  |
| <b>AGPS</b>   | AGPS-1               | TGTTCTATTTCCCTGACCCTAGATGGT | TCTGAGCTTCTGAGTGATCCCATAA  | TGATAA                   |
|               | AGPS-2               | GCCTACTGGGAGTAACAGACATGA    | TCCCTGAGAATTTATCCTCTTGCTT  | TGATAA                   |
|               | AGPS-3               | TTCTTATGCAAGACACCCGGCTGAA   | CCAAGAGCTGTGAAGACATCTCAGT  | CACGTG                   |
| <b>GNPAT</b>  | GNPAT-1              | TCACTGGAGGTCTAGAACTTGAATA   | AAAGGACTCACAGGACCCCAAGA    | TGATAA                   |
|               | GNPAT-2              | AGGACGGCAACACAGGAGA         | TCCGACACTTCTTGACGCTCTG     | CACGTG                   |
| <b>ALDOC</b>  | ALDOC-1              | TCAGTGCTGATGACCCGTGTGAA     | CGATGCCCTTATCCTGGATGGTT    | TGATAA                   |

**Table S5. Primer Sequences for Real-time PCR**

| <b>Gene</b> | <b>Sense Primer</b>     | <b>Anti-sense Primer</b> |
|-------------|-------------------------|--------------------------|
| ACTB        | TGGTGGGCATGGGTCAGAAGGA  | GGAGCCACACGCAGCTCATTGT   |
| AGPS        | AGGGAAGGAATGTTTGAGCGA   | GCAGGACACATCAGGCCAT      |
| AKR1C3      | ACCCAGTCCTTTGTGCCTTGGC  | ACGTTCTGTCTGATGCGCTGCT   |
| AKR1D1      | CACTGGGAGGGCGATGGAAGCT  | ACCTGGTTGCTGACTGGCTTGT   |
| ALDOC       | ATGCCTCACTCGTACCCAG     | TTTCCACCCCAATTTGGCTCA    |
| CES1        | GCGCTGGGTCCAGGACAACATT  | ATGGCCCGGTGGAAGAGGTTCT   |
| GNPAT       | GCTGCTACGAATGTCGGGT     | TGTCCCTTCGAGGAAAAATTCAA  |
| NPC1        | GCACCTTTTACCATCACTCCTG  | GGCCACAGACAATAGAGCAGT    |
| PCK1        | TTGAGAAAGCGTTCAATGCCA   | CACGTAGGGTGAATCCGTCAG    |
| PSAP        | ATGCAAAGACGTTGTCACCG    | GGGAGGTAGGAGTCCACTATCT   |
| SORBS1      | CACAATCGAGAACAGCAAAAACG | ACCCGCCTACTGTCATCCTTT    |
